# Supplementary material
Source: publisher figshare collection journal article supplement (https://tandf.figshare.com/ndownloader/files/20691270)
Supplement: Supplementary file 1 [file 20691270]

## Sheet: Hoja1
		N Artículos	N	LAM		Harlem		S		T		Manila/EIA		M. bovis		Ghana		M. tuberculosis		Euroamericano		Vole		Turquia		Beijing		Patrones Unicos		Patrones Huerfanos		No reportados		X		DESCONOCIDO/Unk		MANU		WEST AFRICAN		DHELI-CAS		CAMEROON		M. canetti		H37Rv
				n	%	n	%	n	%	n	%	n	%	n	%	n	%	n	%	n	%	n	%	n	%	n	%	n	%	n	%	n	%	n	%	n	%	n	%	n	%	n	%	n	%	n	%	n	%
	Mexico	1	94											13	13.8			66	70
		2	198									3	1.6							6	3.2					2	1.06					176	94
		3	180	25	13.88	12	6.68	10	5.56	65	36.14	2	1.11	1	0.56																			47	26.13	7	3.91
		4	267	22	24.3	13	13.9			17	18.8			3	3.3											1	1.1	19	21.1					4	4.4			4	4.4
		5	90	31	11.6	8	3	5	1.9	30	11.2	119	44.6													1	0.4	59	22.1					3	1.1	2	0.8	10	3.7
		6	120	22	18	17	14	1	1.1	20	14	2	1													3	2			28	23			26	22	1	1.1
		7	109	3	2.75	2	1.83			37	33.95	5	4.58													3	2.75							2	1.83
		8	232									8	3.4							221	95.3					3	1.3	75	78	52	24.9
		9	183	28	15	31	17	3	2	35	20	4	2	1	1							2	1	2	1	2	1			10	10			53	29					2	1	1	1
		11	68	12	17.7	12	17.7	4	5.9	26	38.3	1	1.5													1	1.5							4	7.4	4	5.9
		12	6											47	2.2
		13	54	4	7.4	5	9.25	6	11.11			2	3.7			5	9.25									3	5.55			9	16.6			5	9.25	13	24.1							2	3.7
		14	80	9	11	6	8	3	4			7	9			1	1							2	2					45	60															1	1	3	4
100		15	140	27	19.3	20	14.3	19	13.6			3	2.1			1	0.7									6	4.3									35	25							8	5.7	1	1
		16	80	9	11	6	8	3	4			7	9			1	1							2	2					44	60															1	1	3	4
	Total Mexico	16	1901	192	9.91736	132	6.81818	54	0.446281	230	11.8802	163	8.41942	65	3.35744	8	0.413223	66	3.40909	227	11.7252	2	0.103306	6	0.309917	25	1.29132	153	7.90289	188	9.71074	176	9.09091	144	7.43802	62	3.20248	14	0.72314	2	0.103306	1	0.0516529	10	0.516529	3	0.154959	6	0.309917
	Guatemala	1	39	11	28.3	1	2			8	16															2	5.1	1	2	4	8			8	16	4	8
		2	514																							11	2.1
	Total Guatemala	2	553	11	2	1	0.001	0	0	8	1.4	0	0	0	0	0	0	0	0	0	0	0	0	0	0	13	26	1	2	4	8	0	0	8	16	4	8	0	0	0	0	0	0	0	0	0	0	0	0
	Honduras	1	206	113	55	34	16	2	1	33	16															1	0.5							12	6	11	5.3
	Total Honduras	1	206	113	55	34	16	2	1	33	16															1	0.5							12	6	11	5.3
	Panamá	1	231	158	68
		2	66	57	78.8	13	7.6			16	6	1	0.6													2	1.2							5	4.5			2	1.2			1	0.6
		3	54	19	35	10	18.52			15	28															2	3.7							2	3.7	5	9.26
	Total Panama	3	351	234	75.7282	23	7.44337	0	0	31	10.0324	1	0.323625	0	0	0	0	0	0	0	0	0	0	0	0	4	1.2945	0	0	0	0	0	0	7	2.26537	5	1.61812	2	0.647249	0	0	1	0.323625	0	0	0	0	0	0
	Haití	1	157	27	17.2	27	17.2			3	1.9															1	1.5			28	17.8			10	6.3
	Total Haití	1	157	27	17.2	27	17.2			3	1.9															1	1.5			28	17.8			10	6.3
	Cuba	1	160																							23	14
		2	92																							3	3.3
		3	89																							7	7.9
		4	308	52	16.9	53	17.2	58	18.8	18	5.8															79	25.6	48	15.5
	Total Cuba	4	649	52	15.2493	53	15.5425	58	17.0088	18	5.27859	0	0	0	0	0	0	0	0	0	0	0	0	0	0	112	32.8446	48	14.0762	0	0	0	0	0	0	0	0	0	0	0	0	0	0	0	0	0	0	0	0
	Islas del Caribe	1	145	14	9.59	47	32.2	2	1.36							33	22.6							2	1.36	2	2.05									27	18.5					3	2.1	7	4.8			2	1.36
		2	334	75	22.5	98	29.3			82	24.6															6	1.8
		3	132	16	11.36							15	11.36																			20	15.15	7	5.3	74	56.6
		4	480	30	6.25	17	3.54			127	26.45	51	10.6																			153	31.9	28	5.83	74	15.41
	Total Islas del Caribe	4	1091	135	12.374	162	2.52429	2	0.183318	209	19.1567	66	21.96	0	0	33	3.02475	0	0	0	0	0	0	2	0.183318	8	0.733272	0	0	0	0	173	15.857	35	3.20807	175	16.0403	0	0	0	0	3	0.274977	7	0.641613	0	0	2	0.183318
	COLOMBIA	1	137	0																						11	8.03
		2	1	0																						1	100
		3	160	50	31.3	36	22.5			9	5.6															25	15.6			25	16.6			6	3.8
		4	152	75	49.34	38	25	5	3.29	21	13.8															1	0.65							2	1.32	10	5.58
		5	10	1	1	2	2	1	1																	5	5
		6	68	0																						22	32.35			4	5.88
		7	414	156	37.68	177	42.75	3	0.72	34	8.2																							7	1.69	17	4.1
		8	1	0																						1	100
		9	741	300	40.47	143	19.3	8	1.07	75	9.98			1	0.13															126	17			12	1.75
		10	63	26	41.27	9	14.29			7	11.11															24	3.23			19	30.16			1	1.59			4	0.54			1	0.13
		11	7	0																						7	100
		12	1	0																						1	100
		13	234	87	37.2	37	15.8	6	2.6	19	8.1															2	0.9			70	29.9			5	2.1
	Total Colombia	13	1989	695	38.6111	442	24.5556	23	1.27778	165	9.16667	0	0	1	0.0555556	0	0	0	0	0	0	0	0	0	0	100	5.55556	0	0	244	13.5556	0	0	33	1.83333	27	1.5	4	0.222222	0	0	1	0.0555556	0	0	0	0	0	0
	Venezuela	1	670	411	74	16	3	1	1	70	13																	121	29.4							51	9
		2	36	23	64	3	8			8	22															2	6
		3	317	144	45.2	7	2.2	3	0.9	16	4.9			1	0.39															92	29.6			3	0.9
		4	1298	688	53	65	5	25	1.9	130	10	3	0.2													5	0.4							16	1.2	232	17.9
		5	469	353	75	7	1.5	3	0.63	25	5.33															1	0.21	5	1.07
	Total Venezuela		2790	1619	60.9334	98	3.68837	32	1.20437	249	9.37147	3	0.112909	1	0.0376364	0	0	0	0	0	0	0	0	0	0	8	0.301091	126	4.74219	92	3.46255	0	0	19	0.715092	283	10.6511	0	0	0	0	0	0	0	0	0	0	0	0
	Perú	1	8																							8	100
		2	2140																							200	9.3
		3	323	78	24.15	108	33.45			81	25.09															30	9.29							13	4.03
		4	199	25	12.6	59	29.6			31	16.6															28	14.1							7	3.5
		5	227	23	16.19	62	43.67			40	28.2															13	9.15							2	1.41	2	1.4
		6	791	171	37	279	60.4	3	0.7							1	0.2									130	16.4							9	1.9	198	12.39
		7	2139	736	35	690	33			196	9.4															197	9							135	6.5
		8	3	3	100
		9	236	175	44	44	19																			17	4
		10	140	25	17.9	50	35.7	3	2.1	27	19.3															11	7.9			14	10			6	4.3
	Total Perú	10	6206	1236	31.2121	1292	32.6263	6	0.151515	375	9.4697	0	0	0	0	1	0.0252525	0	0	0	0	0	0	0	0	634	16.0101	0	0	14	0.353535	0	0	172	4.34343	200	5.05051	0	0	0	0	0	0	0	0	0	0	0	0
	Ecuador	3	380	0	0	0	0	0	0	0	0	0	0	0	0	0	0	0	0	0	0	0	0	0	0	6	1.58	0	0	0	0	0	0	0	0	0	0	0	0	0	0	0	0	0	0	0	0	0	0
		2	104	35	33.7	4	3.8	6	5.8							32	30.8									2	1.92			21	20.6													4	3.8
		1	28	0	0	0	0	0	0	0	0	0	0	0	0	0	0	0	0	27	96.5	0	0	0	0	1	3.5	0	0	0	0	0	0	0	0	0	0	0	0	0	0	0	0	0	0	0	0	0	0
	Total Ecuador		512	35	33.7	4	3.8	6	5.8	0	0	0	0	0	0	32	30.8	0	0	27	19.5652	0	0	0	0	9	6.52174	0	0	21	20.6	0	0	0	0	0	0	0	0	0	0	0	0	4	3.8	0	0	0	0
	Bolivia			0	0	0	0	0	0	0	0	0	0	0	0	0	0	0	0	0	0	0	0	0	0	0	0	0	0	0	0	0	0	0	0	0	0	0	0	0	0	0	0	0	0	0	0	0	0
		1	100	26	26.3	40	40	2	2	22	22.2	0	0	0	0	0	0	0	0	0	0	0	0	0	0	0	0	0	0	9	9.1	0	0	1	1	0	0	0	0	0	0	0	0	0	0	0	0	0	0
	Total Bolivia	1	100	26	26	40	40	2	2	22	22	0	0	0	0	0	0	0	0	0	0	0	0	0	0	0	0	0	0	9	9	0	0	1	1	0	0	0	0	0	0	0	0	0	0	0	0	0	0
		1	41	15	36.5	5	12.2			17	41.5																									3	7.3
		2	43	17	39.5	3	7			14	32.5																			6	13.95			1	2.3
		3	103	35	34	17	16.5	2	1.9	34	33			1	0.97											2	1.9			7	6.8			3	2.9					1	0.97	1	0.97
		4	458	186	40.61	62	13.54			156	34.96															2	0.44							18	3.93	32	6.99			1	0.22			1	0.22
	Total chile	4	645	253	39.4081	87	13.5514	2	0.311526	221	34.4237	0	0	1	0.155763	0	0	0	0	0	0	0	0	0	0	4	0.623053	0	0	13	2.02492	0	0	22	3.42679	35	5.45171	0	0	2	0.046729	1	0.0233645	1	0.155763	0	0	0	0
	Paraguay
		1	220	115	52.3	40	18.2	21	9.5	19	8.6															1	0.5							2	0.9	22	10
	Total Paraguay		220	115	52.2727	40	18.1818	21	9.54545	19	8.63636	0	0	0	0	0	0	0	0	0	0	0	0	0	0	1	0.454545	0	0	0	0	0	0	2	0.909091	22	10	0	0	0	0	0	0	0	0	0	0	0	0
	Argentina	1	590																							5	0.85
		2	157	36	23	58	37			28	18															2	1.28
		3	787	305	38.8	286	36.3	22	2.8	109	13.9															12	1.5			30	30.8			8	0.9
		4	1025	347	33.9	226	22	30	2.9	283	27.6			2	0.2											2	0.2							12	1.2	115	11.2							2	0.2
		5	816	271	33.2	159	19.5	26	3.2	293	35.9			2	0.2											2	0.2							12	1.5	42	5.2							2	0.2
	Total Argentina	5	3375	959	34.7842	729	26.4418	78	2.82916	713	25.8614	0	0	4	0.145085	0	0	0	0	0	0	0	0	0	0	23	0.83424	0	0	30	1.08814	0	0	32	1.16068	157	5.6946	0	0	0	0	0	0	4	0.145085	0	0	0	0
	Brasil	1	366	204	55.7	57	15.5	8	2	91	24.8	1	0.27													2	0.55
		2	50	27	54	8	16			10	20	1	2																							4	8
		3	93	26	28	11	11.8	1	1.09	24	25.5															4	4.3							1	1.09
		4	106	54	50	13	12.2	2	1.8	16	15.1																							2	1.8	19	18
		5	361	241	66.7	35	9.7	9	2.5	7	2	11	3													2	0.5							19	5.2	1	0.2
		6	1991	562	28	242	12.1	39	1.9	395	20	17	0.9													3	0.003			251	12.7			93	4.7	176	8.8	8	0.4
		7	115	40	35	14	12	1	0.87	3	2.7	2	1.7																	5	4.3			1	0.87
		8	237	119	50	18	7.6	3	1.3	49	21																			22	9.2			5	2.1
		9	740	333	44.73	153	20.68	11	1.49	148	20	4	0.54													7	0.95			51	6.9					60	8.11					1	0.13
		10	10																							10	100
		11	218	95	43.6	40	18.3			76	34.9	5	2.29													1	0.45							1	0.45
		12	8																							8	100
		13	60	30	50	8	13.3	1	1.7	15	25																							1	1.7
		14	84	49	58.3	12	14.3			17	20
	Total Brasil	14	4439	1780	40.0991	611	13.7644	75	1.68957	851	19.171	41	0.923631	0	0	0	0	0	0	0	0	0	0	0	0	37	0.833521	0	0	329	7.41158	0	0	123	2.77089	260	5.85717	8	0.180221	0	0	1	0.0225276	0	0	0	0	0	0
	Total		25123		6488	472.61	3042	214.481	277	26.4902	2434	185.263	274	15.9175	68	3.65144	42	3.46059	66	3.46275	254	108.338	2	0.104932	8	0.498113	980	69.4518	328	21.9394	921	81.0812	349	25.091	588	58.3599	1084	70.0648	28	1.68565	4	0.151443	8	0.708403	18	1.32131	3	0.157398	8
[truncated: 10 more columns]
